# Supplementary material for: Synthesis, physical properties and field-effect transistors of novel thiazolothiazole–phenylene co-oligomers
Source: Royal Society of Chemistry journal article supplement (doi:10.1039/b611814c), 2006-11-24
Supplement: b611814c.pdf [file b611814c.pdf]

# Synthesis, Physical Properties and Field-Effect Transistors of Novel Thiazolothiazole/Phenylene Co-Oligomers\*\*

Shinji Ando, Daisuke Kumaki, Jun-ichi Nishida, Hirokazu Tada, Youji Inoue,  
Shizuo Tokito, Yoshiro Yamashita.\*

## SUPPLEMENTARY INFORMATION

**Optical and Electrochemical Measurements.** UV-vis spectra were recorded on a SHIMADZU Multi Spec-150. Emission spectra were collected on a SHIMADZU RF-1500 spectrometer. Cyclic voltammogram (CV) was recorded on a BAS-100B system containing tetrabutylammonium hexafluorophosphate ( TBAPF<sub>6</sub> ) ( 0.1 mol dm<sup>-3</sup> in dry CH<sub>2</sub>Cl<sub>2</sub> ). The Pt disk, Pt wire and SCE were used as the working, counter, and reference electrodes, respectively.

**X-ray Diffraction Measurements.** X-ray diffraction (XRD) measurements were carried out with a JEOL JDX-3530 X-ray diffractometer system. XRD patterns were obtained using Bragg-Brentano geometry with CuK $\alpha$  radiation as an X-ray source with an acceleration voltage of 40 kV and a beam current of 30 mA.

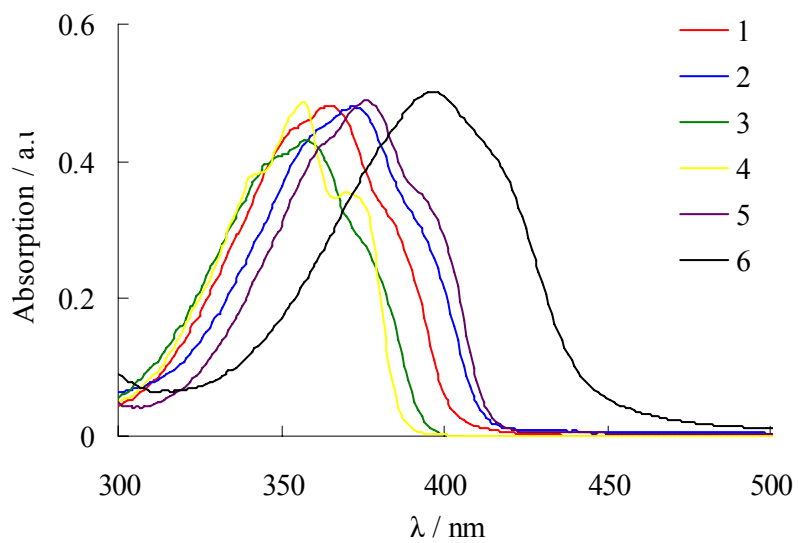

**Fig. S1** Absorption spectra of **1–6** in CHCl<sub>3</sub>.

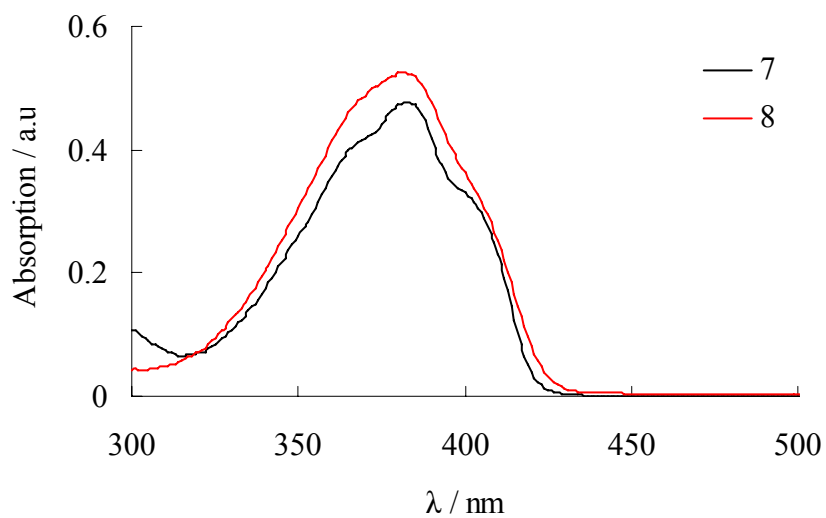

**Fig. S2** Absorption spectra of **7–8** in CHCl<sub>3</sub>.

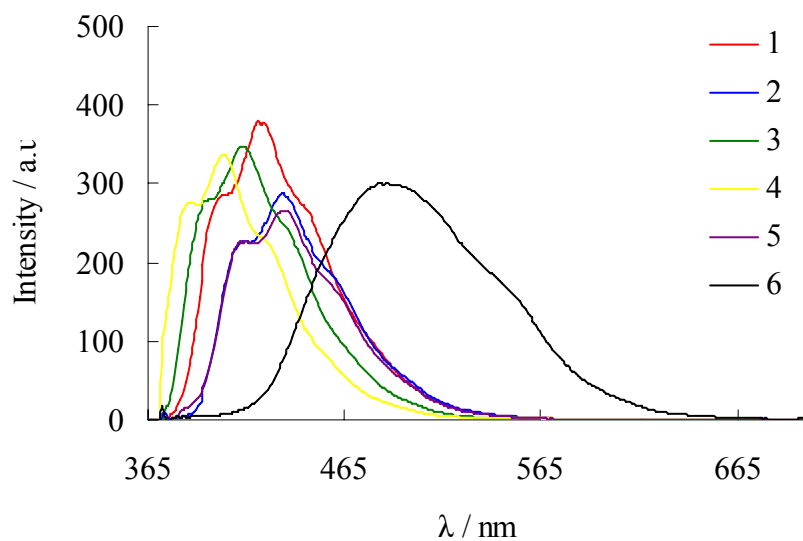

**Fig. S3** Emission spectra of **1–6** in CHCl<sub>3</sub>.

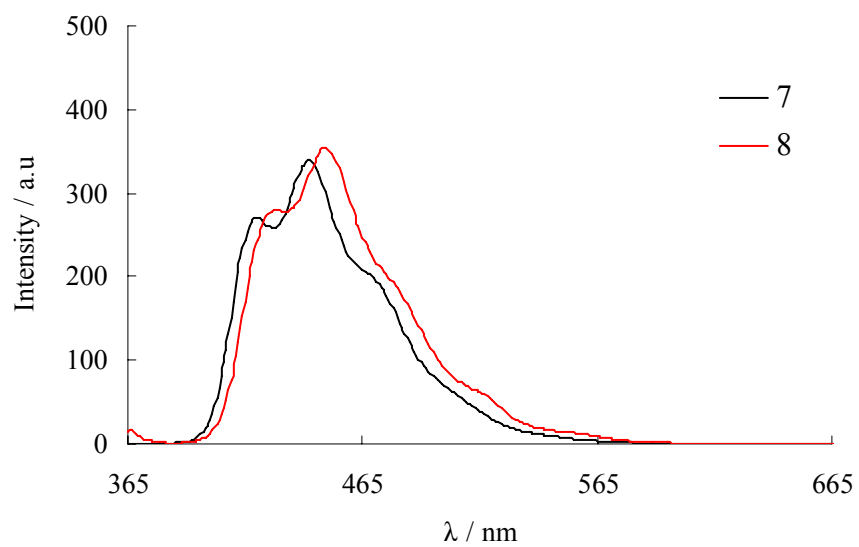

**Fig. S4** Emission spectra of **7–8** in CHCl<sub>3</sub>.

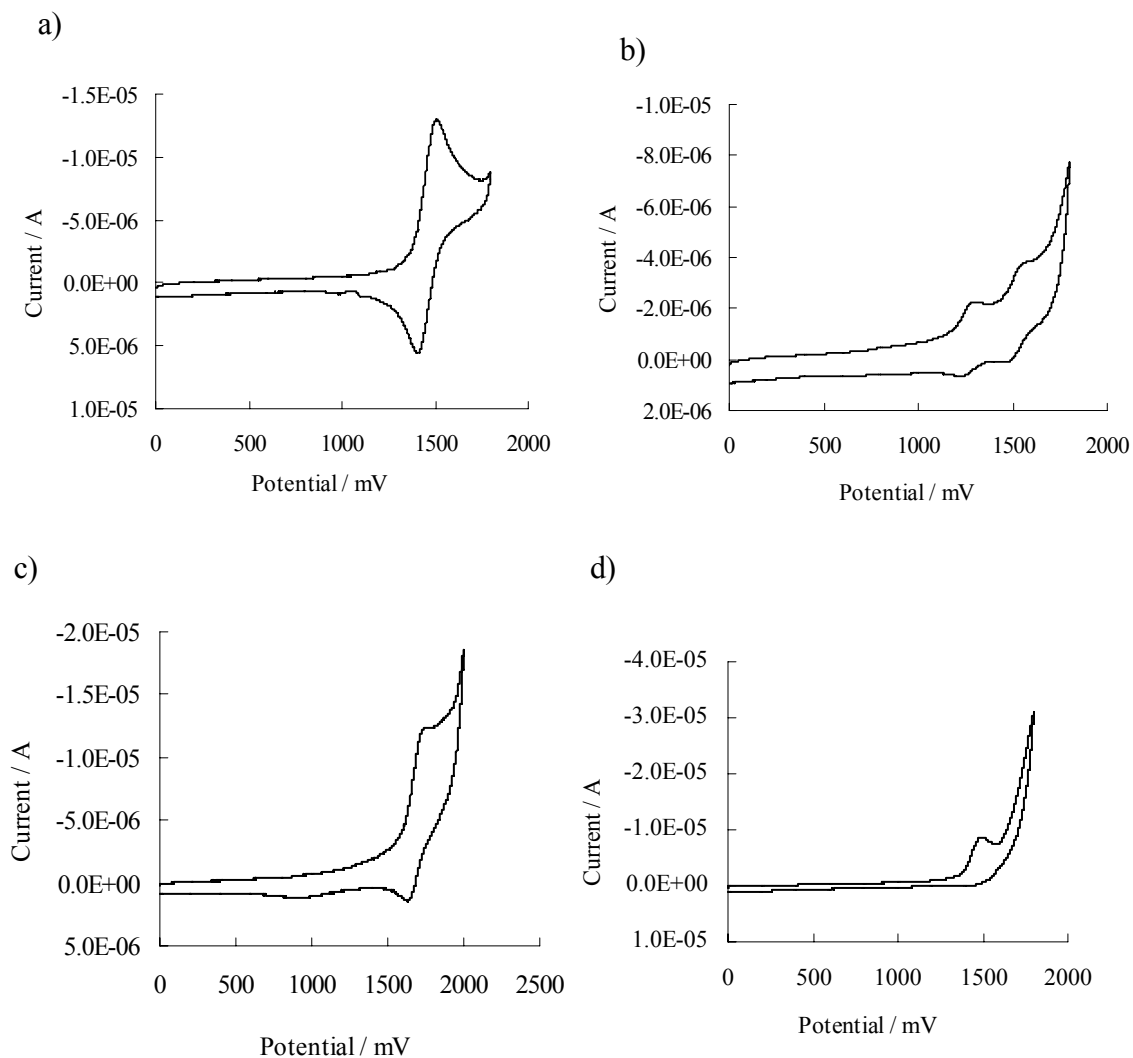

**Fig. S5** Cyclic voltammograms of thiazolothiazole/phenylene co-oligomers **1** (a), **2** (b), **3** (c) and **7** (d). Conditions: 0.1 M (*n*-Bu)<sub>4</sub>NPF<sub>6</sub> in CH<sub>2</sub>Cl<sub>2</sub>; working electrode, Pt disk (1-mm diameter); counter electrode, Pt wire; reference electrode, SCE.

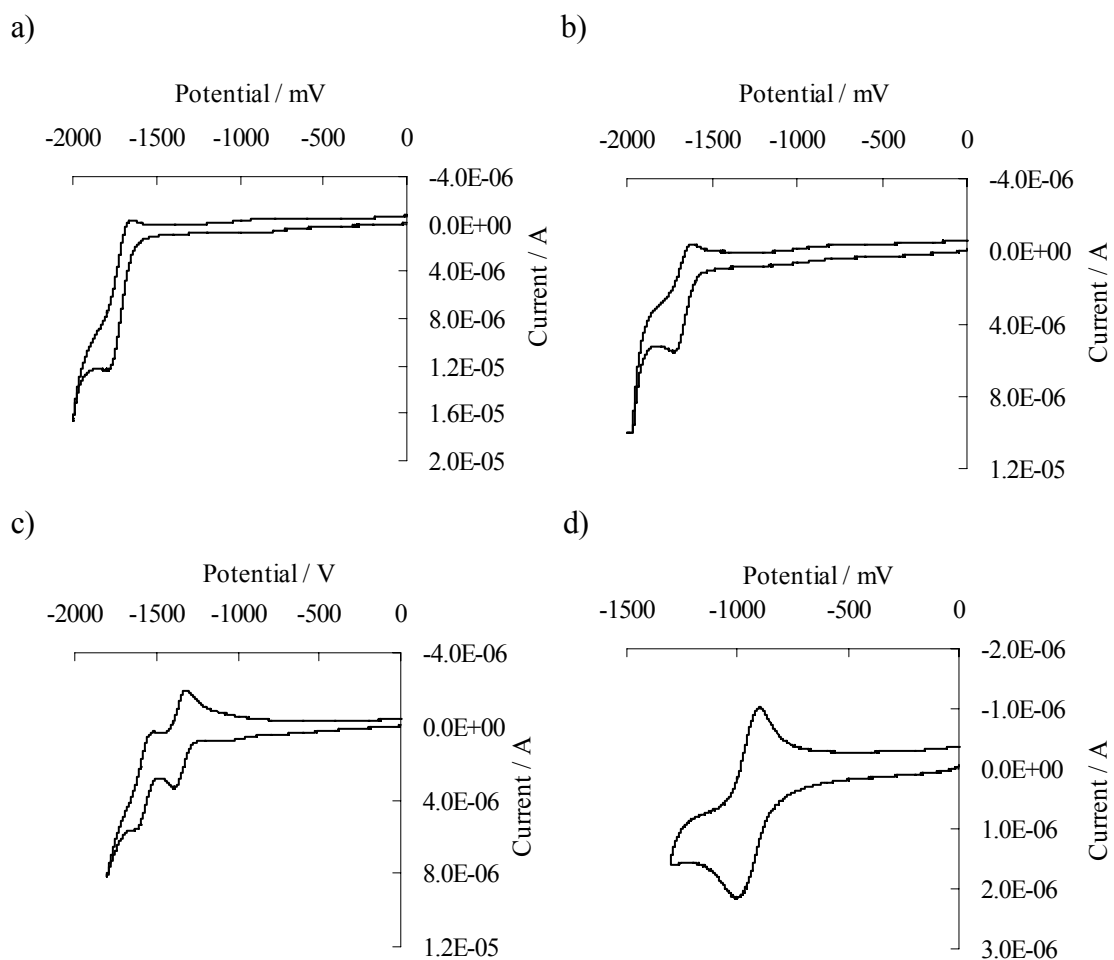

**Fig. S6** Cyclic voltammograms of thiazolothiazole/phenylene co-oligomers **3** (a), **4** (b), **5** (c) and **6** (d). Conditions: 0.1 M (*n*-Bu)<sub>4</sub>NPF<sub>6</sub> in CH<sub>2</sub>Cl<sub>2</sub>; working electrode, Pt disk (1-mm diameter); counter electrode, Pt wire; reference electrode, SCE.

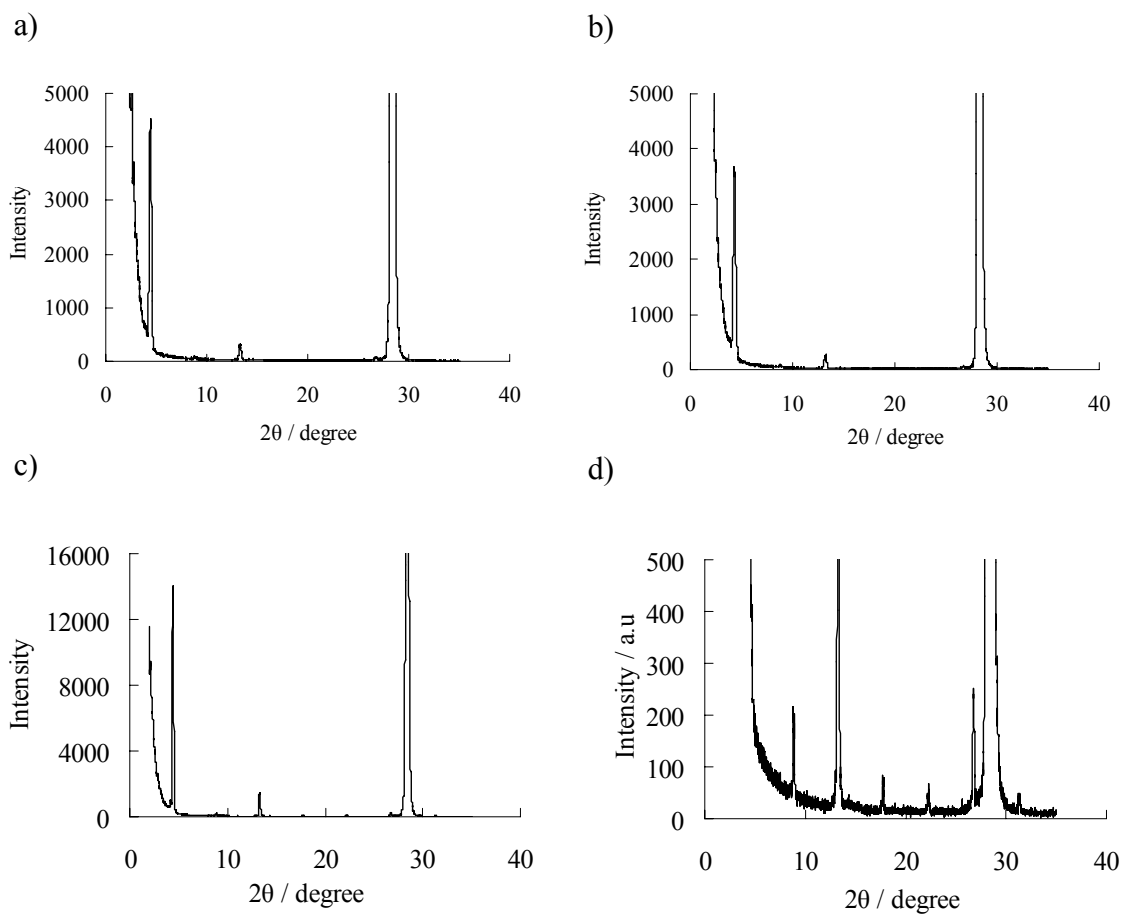

**Fig. S7** X-ray diffractograms from 50 nm films of derivatives **7**; deposited at a) 20°C, b) 50°C, c) 70°C and d) an enlarged picture at 70°C of vertical axis.

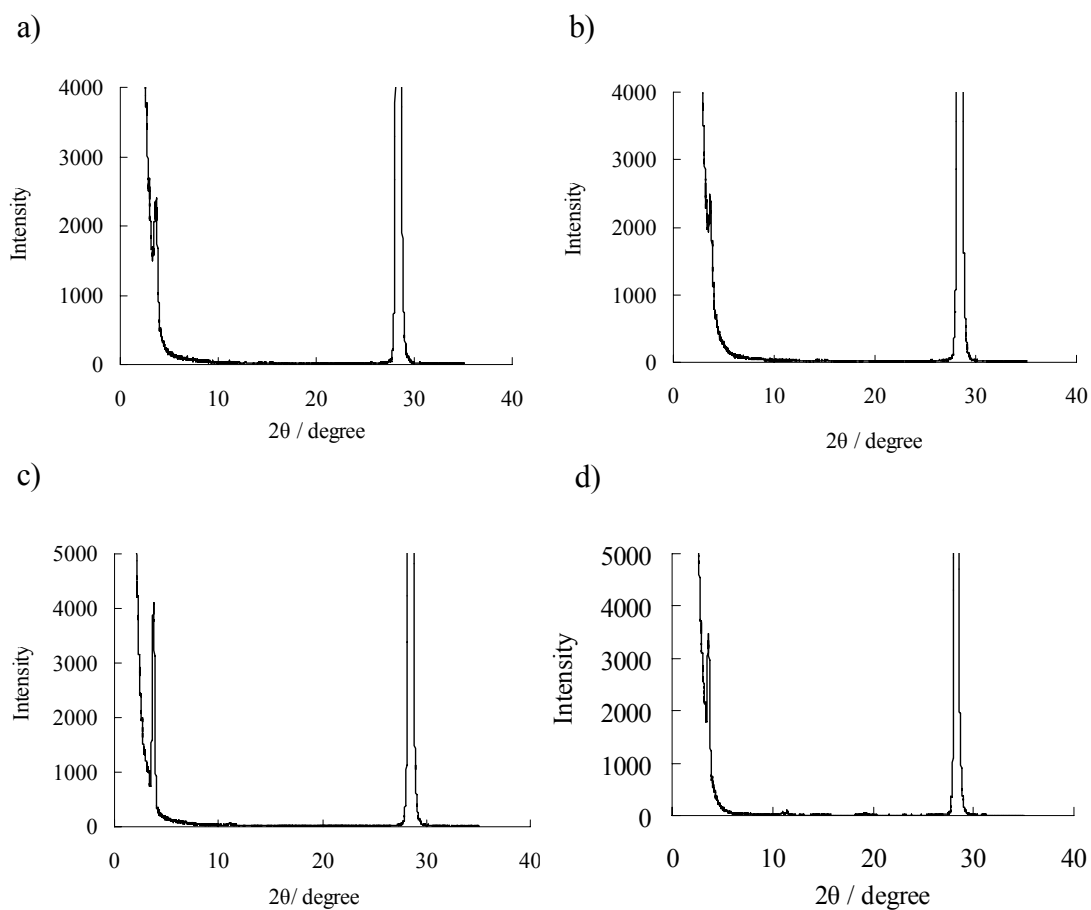

**Fig. S8** X-ray diffractograms from 50 nm films of derivatives **8**; deposited at a) 20°C, b) 50°C, c) 70°C and d) at 70°C on HMDS.

a)

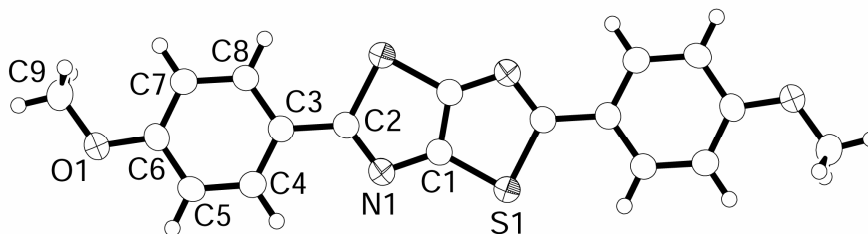

b)

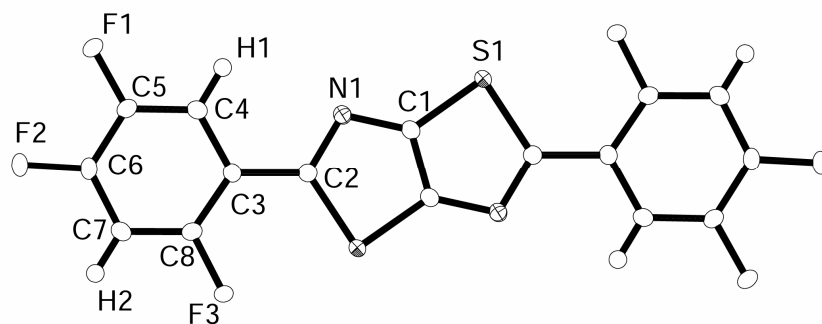

c)

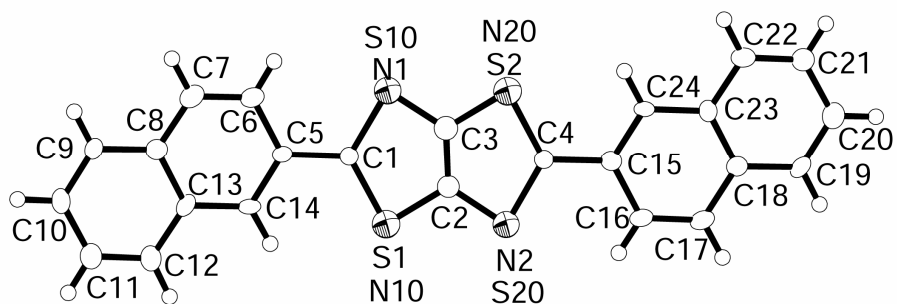

**Fig. S9** Molecular structure of compound 2(a), 4(b) and 7(c).
